# Supplementary material for: Integrating Literature-Based Knowledge Database and Expression Data to Explore Molecular Pathways Connecting PPARG and Myocardial Infarction
Source: PPAR Res. 2020 Jun 1;2020:1892375. doi: 10.1155/2020/1892375 (PMC7284928; doi:10.1155/2020/1892375)
Supplement: Supplementary Materials — were provided for this study (an excel file), including the following worksheets: PPARG_MI_Pathway, 30 Genes, 125 Genes, Mega-analysis, GSEA, and Ref4PPCN. [file 1892375.f1.xlsx]

## Sheet: PPARG_MI_Pathway
Relation	Type	Sentence	TextRef
myocardial infarction ---> ALB	QuantitativeChange	We found that the presence of low albumin and low bilirubin was associated with a higher risk of myocardial infarction in men and women.	info:pmid/12586275#body:50
myocardial infarction ---> ALB	QuantitativeChange	Previous studies have shown that low serum albumin concentrations were associated with increased risk for the development of myocardial infarction , coronary artery disease and stroke [5–8].	info:pmid/28429111#cont:23
myocardial infarction ---> ALB	QuantitativeChange	In the Framingham Offspring Study, lower serum albumin concentration was associated with a higher incidence of myocardial infarction in both men and women after adjusting for traditional risk factors and was associated with all-cause mortality in women during >20years of follow-up.	info:pmid/29074121#body:3
PPARG ---> CAV1	PromoterBinding	Caveolin-1 mRNA levels were found to be upregulated by PPARgamma ligands already after 3 h in both the cell lines.	info:pmid/12813462
PPARG ---> CAV1	PromoterBinding	Caveolin-1 mRNA levels were found to be upregulated by PPARgamma ligands already after 3 h in both the cell lines.	info:pmid/12813462#abs:8
PPARG ---> CAV1	PromoterBinding	Moreover, in SW-480 cells, the induced caveolin-1 expression is inhibited by the PPAR? antagonist T007.	info:pmid/15798084
PPARG ---> CAV1	PromoterBinding	Activation of PPARgamma by its ligand rosiglitazone upregulates caveolin-1 mRNA and protein in human carcinoma cells.	info:pmid/18507034#abs:3
PPARG ---> CAV1	PromoterBinding	Activation of PPARgamma by its ligand rosiglitazone upregulates caveolin-1 mRNA and protein in human carcinoma cells.	info:pmid/18507034
PPARG ---> CAV1	PromoterBinding	Peroxisome proliferator-activated receptor gamma (PPARgamma) activation or overexpression induces caveolin-1 (cav-1) expression in several cell types.	info:pmid/15314095
PPARG ---> CAV1	PromoterBinding	Peroxisome proliferator-activated receptor gamma (PPARgamma) activation or overexpression induces caveolin-1 (cav-1) expression in several cell types.	info:pmid/15314095#abs:1
PPARG ---> CAV1	PromoterBinding	In MDA-MB231 cell, CDIM9 induced caveolin-1 and p27 expression, which was significantly downregulated by co-treatment with the PPAR-gamma antagonist GW9662.	info:pmid/17764562
PPARG ---> CAV1	PromoterBinding	In MDA-MB231 cell, CDIM9 induced caveolin-1 and p27 expression, which was significantly downregulated by co-treatment with the PPAR-gamma antagonist GW9662.	info:pmid/17764562#abs:7
PPARG ---> CAV1	PromoterBinding	We observed that CDDO is capable of inhibiting growth of HER2-overexpressing cells, both in vitro and in a xenograft murine model of breast cancer, in part via the PPAR?-dependent induction of caveolin-1 expression.	info:pmid/16505105
PPARG ---> CAV1	PromoterBinding	Moreover, induction of PPAR?-dependent caveolin-1 expression by =7.5 μmol/L DIM-C-pPhCF3 or DIM-C-pPhC6H5 is lost in cells treated with 10 μmol/L concentrations of these same compounds (Fig. 4B) where extensive apoptosis is observed.	info:pmid/16731770
PPARG ---> CAV1	PromoterBinding	The increased expressions of LDL transcytosis-related proteins (LDL receptor and caveolin-1, -2) stimulated by TNF-a were also blocked by both NF-?B inhibitors and PPAR-? inhibitors.	info:pmid/24594319
PPARG ---> CAV1	PromoterBinding	The increased expressions of LDL transcytosis-related proteins (LDL receptor and caveolin-1, -2) stimulated by TNF-α were also blocked by both NF-κB inhibitors and PPAR-γ inhibitors.	info:pmid/24594319#abs:8
PPARG ---> CAV1	PromoterBinding	The proximal sterol-regulatory elements (-287) (14) of the human Cav1 promoter partially overlaps with a predicted peroxisome proliferator activated receptor? site (47), another important transcription factor involved in lipid synthesis.	info:pmid/22474125
PPARG ---> CAV1	PromoterBinding	We further show that integrin alpha1-null MCs have increased levels of activated extracellular signal-regulated kinase (ERK), which leads to reduced activation of peroxisome proliferator-activated receptor gamma (PPARgamma), a transcription factor that positively regulates Cav-1 expression.	info:pmid/20368353
PPARG ---> CAV1	PromoterBinding	We further show that integrin alpha1-null MCs have increased levels of activated extracellular signal-regulated kinase (ERK), which leads to reduced activation of peroxisome proliferator-activated receptor gamma (PPARgamma), a transcription factor that positively regulates Cav-1 expression.	info:pmid/20368353#abs:5
PPARG ---> CAV1	PromoterBinding	Moreover, in SW-480 cells, the induced caveolin-1 expression is inhibited by the PPARγ antagonist T007.	info:pmid/15798084#body:203
PPARG ---> CAV1	PromoterBinding	peroxisome proliferator-activated receptor-γ binds to response elements in the caveolin-1 promoter and triggers caveolin-1 transcription [18,50].	info:pmid/17764562#body:278
PPARG ---> CAV1	PromoterBinding	Peroxisome proliferator-activated receptor-gamma upregulates caveolin-1 and caveolin-2 expression in human carcinoma cells.	info:pmid/12813462#title:1
PPARG ---> CAV1	PromoterBinding	Integrin alpha1beta1 regulates epidermal growth factor receptor activation by controlling peroxisome proliferator-activated receptor gamma-dependent caveolin-1 expression.	info:pmid/20368353#title:1
PPARG ---> CAV1	PromoterBinding	We observed that CDDO is capable of inhibiting growth of HER2-overexpressing cells, both in vitro and in a xenograft murine model of breast cancer, in part via the PPARγ-dependent induction of caveolin-1 expression.	info:pmid/16505105#body:75
PPARG ---> CAV1	PromoterBinding	Moreover, induction of PPARγ-dependent caveolin-1 expression by ≥7.5 μmol/L DIM-C-pPhCF3 or DIM-C-pPhC6H5 is lost in cells treated with 10 μmol/L concentrations of these same compounds (Fig. 4B) where extensive apoptosis is observed.	info:pmid/16731770#body:220
PPARG ---> CAV1	PromoterBinding	The proximal sterol-regulatory elements (?287) (14) of the human Cav1 promoter partially overlaps with a predicted peroxisome proliferator activated receptorγ site (47), another important transcription factor involved in lipid synthesis.	info:pmid/22474125#cont:380
PPARG ---> CAV1	PromoterBinding	This suggests that the effect of rosiglitazone on cav-1 expression may be mediated by transcription activation upon binding of PPARγ/RXR heterodimers to the newly identified peroxisome proliferator response element in the promoter of the cav-1 gene.	info:pmid/15314095#body:270
PPARG ---> ALB	PromoterBinding	Forced expression of PPAR-gamma or C/EBP-alpha in Pancreatic stellate cells increased albumin mRNA and protein levels by >2.5-fold, which is accompanied with increased C/EBP-beta binding to albumin promoter.	info:pmid/19932685#abs:4
PPARG ---> ALB	PromoterBinding	No significant binding of PPAR-γ to the albumin promoter was detected (data not shown).	info:pmid/19932685#body:83
PPARG ---> ALB	PromoterBinding	No significant binding of PPAR-γ to the albumin promoter was detected (data not shown).	info:pmid/20529675#body:62
PPARG ---> ALB	PromoterBinding	We then tested the possibility that PPAR-γ and C/EBP-α may modulate albumin gene expression.	info:pmid/19932685#body:65
PPARG ---> ALB	PromoterBinding	To elucidate the molecular mechanism for the PPAR-γ- and C/EBP-α-induced albumin expression, we examined DNA-protein interaction with albumin promoter.	info:pmid/19932685#body:79
PPARG ---> ALB	PromoterBinding	Forced expression of PPAR-γ or C/EBP-α in activated pancreatic stellate cells induced albumin expression, thereby reverting cells to the quiescent phenotype.	info:pmid/19932685#body:15
PPARG ---> ALB	PromoterBinding	Although further study should be needed to elucidate detailed molecular mechanisms, our findings suggest that C/EBP-β may act as a positive regulator in PPAR-γ or C/EBP-α-induced albumin expression.	info:pmid/19932685#body:91
PPARG ---> ALB	PromoterBinding	Although further study should be needed to elucidate detailed molecular mechanisms, our findings suggest that CCAAT/enhancer-binding protein-β may act as a positive regulator in PPAR-γ or CCAAT/enhancer-binding protein-α-induced albumin expression in differentiated 3T3-L1 cells.	info:pmid/20529675#body:80
PPARG ---> ALB	PromoterBinding	To elucidate the mechanism by which PPAR-γ and C/EBP-α induce albumin gene expression in pancreatic stellate cells, we performed DNA-protein interaction study and found that C/EBP-β binding to the albumin promoter (nt -386 and +16) is significantly increased by PPAR-γ and C/EBP-α ( A).	info:pmid/19932685#body:87
PPARG ---> ALB	PromoterBinding	As it was demonstrated that albumin plays a direct role in the formation of cytoplasmic lipid droplets in quiescent pancreatic stellate cells and adipogenic transcription factors, PPAR-γ and CCAAT/enhancer-binding protein-α, induce albumin expression , we sought to examine the role of albumin in adipocyte differentiation.	info:pmid/20529675#body:75
PPARG ---> ADIPOR2	Expression	Additionally, GW9662 (PPAR-γ antagonist) significantly decreased the effects of telmisartan on AdipoR1 and AdipoR2 expression.	info:pmid/28837879#abs:9
PPARG ---> ADIPOR2	Expression	Therefore, these data suggest that a PPARgamma agonist increases expression of AdipoR2 and that insulin inhibits the expression of AdipoR2 through the PI3K pathway.	info:pmid/18054196#abs:8
PPARG ---> ADIPOR2	Expression	These data suggest that pioglitazone enhances adiponectin's autocrine and paracrine actions in 3T3-L1 adipocytes via upregulation of peroxisome proliferator-activated receptorγ-mediated AdipoR2 expression.	info:pmid/21514306#abs:10
PPARG ---> ADIPOR2	Expression	In addition, adenovirus-mediated peroxisome proliferator-activated receptorγ expression significantly enhanced the effects of pioglitazone on insulin-stimulated 2-deoxyglucose uptake and AdipoR2 expression in 3T3-L1 adipocytes.	info:pmid/21514306#abs:9
PPARG ---> ADIPOR2	Expression	AdipoR2 gene expression is upregulated by a PPARγ agonist both in vivo and in vitro (45).	info:pmid/18755807#body:301
PPARG ---> ADIPOR2	Expression	Contradictory results have been reported on whether PPARγ activation influences expression of adipoR1 and adipoR2 .	info:pmid/17532004#body:173
PPARG ---> ADIPOR2	Expression	It has been reported that activation of PPARγ signaling induces the expression of AdipoR2 in macrophages and hepatocytes .	info:pmid/27216461#body:116
PPARG ---> ADIPOR2	Expression	LXR agonists increased the expression of AdipoR1and AdipoR2 in human macrophages, whereas agonists of PPARα and PPARγ only increased the expression of AdipoR2 .	info:pmid/20696134#body:9
PPARG ---> ADIPOR2	Expression	Since the genetic expression of AdipoR in adipose tissue is not regulated by thiazolidinediones ( ), the increased expression of AdipoR2 by naringenin chalcone is unlikely to be mediated through PPARγ activation.	info:pmid/20363289#body:115
PPARG ---> ADIPOR2	Expression	peroxisome proliferator-activated receptor-γ agonist stimulation was previously found to up-regulate the cardiac adipo R1 expression without affecting the expression of adipo R2 in high fat-fed rats (36).	info:pmid/23589922#cont:411
PPARG ---> ADIPOR2	Expression	Oral medication like PPARα and PPARγ agonists, that influence adiponectin receptor 2 mRNA most likely do not explain elevated expression of both receptors because, at least in the obese controls, these drugs have not been applied.	info:pmid/18442481#body:98
PPARG ---> ADIPOR2	Expression	We previously isolated AdipoR1 and AdipoR2 promoters and found that the PPARγ agonist rosiglitazone can interact functionally with a GR element in the AdipoR2 promoter to mediate the stimulation of AdipoR2 transcription in the liver .	info:pmid/18789331#body:13
PPARG ---> ADIPOR2	Expression	However, we observed that chronic ethanol feeding significantly increased the PPARγ mRNA levels in the mouse liver, suggesting that it is unlikely that the suppression of AdipoR2 mRNA in response to chronic ethanol feeding involves PPARγ.	info:pmid/18755807#body:302
PPARG ---> ADIPOR2	Expression	Chinetti et al found that LXR agonists increased the messenger RNA concentrations of ADIPOR1 and ADIPOR2 in human macrophages, whereas agonists of peroxisome proliferator-activated receptor α and peroxisome proliferator-activated receptor γ increased only the expression of ADIPOR2.	info:pmid/16483885#body:19
PPARG ---> ADIPOR2	Expression	The increase of AdipoR2 expression in adipocytes may be caused by the secondary effect on adipocyte differentiation by peroxisome proliferator-activated receptorγ activation because AdipoR2 expression was dramatically increased during adipocyte differentiation (T.Y., T.K., unpublished data).	info:pmid/16306350#body:319
PPARG ---> ADIPOR2	Expression	Furthermore, peroxisome proliferator-activated receptor-γ agonists appear to enhance the expression of AdipoR1 and AdipoR2 in skeletal muscle and adipose tissue and thereby may enhance adiponectin intracellular signaling pathways that promote glucose utilization and antiatherosclerotic conditions (80).	info:pmid/17142348#body:243
PPARG ---> ADIPOR2	Expression	Several studies showed some selectivity of the effects on one of the 2 receptors: only AdipoR2 expression was stimulated by peroxisome proliferator-activated receptor- α and peroxisome proliferator-activated receptor- γ agonists in macrophages and growth hormone in 3T3-L1 adipocytes , and was inhibited by adiponectin .	info:pmid/18555836#body:16
PPARG ---> ADIPOR2	Expression	Activation of peroxisome proliferator-activated receptorγ also increased the expression of AdipoR2 in adipocytes in vitro and in vivo, but it did not affect the expression of AdipoR2 in either white adipose tissue or brown adipose tissue in vivo because an increase of AdipoR2 expression in stromal-vascular cells in adipose tissues was not observed after peroxisome proliferator-activated receptorγ…	info:pmid/16306350#body:318
PPARG ---> ADIPOR2	Expression	These results confirmed that AdipoR2 expression is increased by different PPARα (Wy14643) and PPARγ (Rosiglitazone and GW929) ligands ( ).	info:doi/10.1016/j.bbrc.2003.12.058#body:57
CAV1 ---> myocardial infarction	Regulation	Further, adoptive transfer of Cav1 null macrophages into WT mice on d3 post-myocardial infarction exacerbated adverse cardiac remodeling at d14 post-myocardial infarction.	info:pmid/25128086#abs:8
CAV1 ---> myocardial infarction	Regulation	Genomic variant in CAV1 increases susceptibility to coronary artery disease and myocardial infarction.	info:pmid/26775120#title:1
CAV1 ---> myocardial infarction	Regulation	Combined, our results demonstrate for the first time that Cav1 participates in the inflammatory responses following Myocardial infarction in mice.	info:pmid/25128086#body:132
CAV1 ---> myocardial infarction	Regulation	Therefore, it is likely that single nucleotide polymorphism rs3807989 increased expression of CAV1, which then leads to development of Coronary artery disease and myocardial infarction.	info:pmid/26775120#body:146
CAV1 ---> myocardial infarction	Regulation	Accordingly, we hypothesized that Cav1 is involved in the regulation of the inflammatory response to Myocardial infarction by regulating macrophage differentiation.	info:pmid/25128086#body:14
CAV1 ---> myocardial infarction	Regulation	To determine the extent to which Cav1 regulates the Transforming growth factor-β-dependent anti-inflammatory function after Myocardial infarction, we analyzed the level of expression of 84 different genes associated with inflammation by real-time PCR.	info:pmid/25128086#body:119
myocardial infarction ---> ACADM	QuantitativeChange	carnitine palmitoyltransferase 1A and ACADM expression were found to be significantly reduced during either hypertrophy or myocardial infarction compared to control ( a and a), confirming significantly impaired fatty acid oxidation during either of the cardiac diseases.	info:pmid/25451023#body:98
myocardial infarction ---> ACADM	QuantitativeChange	carnitine palmitoyltransferase 1A and ACADM expression were found to be significantly reduced during either hypertrophy or myocardial infarction compared to control ( a and Supplementary Fig. 4a), confirming significantly impaired fatty acid oxidation during either of the cardiac diseases.	info:pmid/25451023#body:105
myocardial infarction ---> ACADM	QuantitativeChange	The mRNA level of Fatp, Glut 瘁 Acadm, Acadl, Acadvl, Cpt 猀a, Cpt1b and Cpt2 was decreased in the OVX/myocardial infarction mice compared to that of the OVX/Sham ones while Qiliqiangxin up-regulated mRNA level of Cd36, Fatp, Pdk 瘁 Acadm, Acadl, Acadvl, Cpt 猀a, Cpt 猀b and Cpt2 as compared with the vehicle treated myocardial infarction group.	info:pmid/28647730#cont:170
myocardial infarction ---> ACADM	QuantitativeChange	MCAD gene expression was also decreased in the mouse heart in settings of myocardial infarction [10] (Figure 1C), dilated cardiomyopathy [27] (Figure 1D) and atrial fibrillation [7] (Figure 1D).	info:doi/10.1042/CS20171269#cont:135
myocardial infarction ---> ACADM	QuantitativeChange	carnitine palmitoyltransferase 1A and ACADM expression were found to be significantly reduced during either hypertrophy or myocardial infarction compared to control ( a and a), confirming significantly impaired fatty acid oxidation during either of the cardiac diseases.	info:doi/10.1016/j.jmb.2014.10.026#body:98
myocardial infarction ---> ACADM	QuantitativeChange	carnitine palmitoyltransferase 1A and ACADM expression were found to be significantly reduced during either hypertrophy or myocardial infarction compared to control ( a and Supplementary Fig. 4a), confirming significantly impaired fatty acid oxidation during either of the cardiac diseases.	info:doi/10.1016/j.jmb.2014.10.026#body:105
myocardial infarction ---> ACADM	QuantitativeChange	Rationale for these experiments was based on earlier observations that MCAD expression was positively regulated by the car-dioprotective kinase PI3K in the adult heart, and depressed in the failing mouse heart in a number of cardiac disease models (myocardial infarction, atrial fibrillation and dilated cardiomyopathy).	info:doi/10.1042/CS20171269#cont:296
PPARG ---> POU5F1	Expression	PPARγ inactivation by GW9662 inhibited the troglitazone-induced Oct4 mRNA expression.	info:pmid/23998797#abs:11
PPARG ---> POU5F1	Expression	Treatment with PPARγ activators or overexpression of PPARγ in human adipose tissue-derived stem cells at passage 20 could recover Oct4 expression levels and increase Oct4 promoter activity.	info:pmid/23998797#abs:10
PPARG ---> POU5F1	Expression	Regulation of Oct4 gene expression level by PPARγ	info:pmid/23998797#cont:179
PPARG ---> POU5F1	Expression	These data provide evidence that PPARg directly increases transcription of the Oct4 gene.	info:pmid/23998797#cont:188
PPARG ---> POU5F1	Expression	PPARg inactivation by GW9662 inhibited the troglitazone-induced Oct4 mRNA expression.	info:pmid/23998797#cont:14
PPARG ---> POU5F1	Expression	Regulation of Oct4 transcripts by PPARg in human adipose tissue-derived stem cells.	info:pmid/23998797#cont:231
PPARG ---> POU5F1	Expression	... PPARg activator treatment or PPARg overexpression increased Oct4 mRNA expression, we assessed whether overexpression of PPARg can maintain the ...	info:pmid/23998797#cont:192
PPARG ---> POU5F1	Expression	We found that Oct4 mRNA and Oct4 promoter activity were correlated with PPARg expression, suggesting that PPARg may play a role in the regulation of Oct4 ...	info:pmid/23998797#cont:253
PPARG ---> POU5F1	Expression	Treatment of hADCSs with PPARg activators elevated both PPARg and Oct4 mRNA, and overexpression of PPARg increased Oct4 promoter activity.	info:pmid/23998797#cont:254
PPARG ---> POU5F1	Expression	... PPARg overexpression increased Oct4 promoter activity. human adipose tissue-derived stem cells were transfected with the phOct4-Luc reporter plasmid and ...	info:pmid/23998797#cont:234
PPARG ---> POU5F1	Expression	... PPARg activators or overexpression of PPARg in human adipose tissue-derived stem cells at passage 20 could recover Oct4 expression levels and increase Oct4 ...	info:pmid/23998797#cont:13
PPARG ---> POU5F1	Expression	Application of PPARγ activators or PPARγ overexpression in human adipose tissue-derived MSCs at passage 20 could increase the promoter activity of Oct4, thus recovering the expression of Oct4 and maintaining the differentiation potential of hADSCs45.	info:doi/10.1038/s41419-019-1693-z#cont:246
myocardial infarction ---> RELA	QuantitativeChange	pyrrolidine dithiocarbamate treatment significantly reduced the myocardial infarction-induced nuclear expression of NF-κB p65 and increased the myocardial infarction-induced cytoplasmic expression of IκBα.	info:pmid/23328444#body:67
POU5F1 ---> myocardial infarction	Regulation	Taken together, the findings of this study suggested that collaboration between hypoxia-inducible factor-2α and Oct4 promotes survival and myocardial repair by human very small embryonic-like mesenchymal stem cells in myocardial infarction.	info:pmid/28079892#cont:196
PPARG ---> MYD88	Expression	IL-10R blockage abolished Peroxisome proliferator-activated receptor-γ-mediated inhibition of MyD88 expression.	info:pmid/24489087#abs:10
PPARG ---> MYD88	Expression	It can be concluded that the activation of PPAR-γ receptors may increase the SARM and decrease the MyD88 and NF-κB expression.	info:pmid/26264163#abs:14
PPARG ---> MYD88	Expression	In addition, we demonstrate that PPAR-gamma agonists inhibit TLR2, MyD88, and CD14 expression in glia, suggesting a possible mechanism by which these agonists modulate IL-12 family cytokine expression.	info:pmid/17237441#abs:9
PPARG ---> MYD88	Expression	Activation of peroxisome proliferator-activated receptor γ (PPARγ) suppressed oxidized low-density lipoprotein-induced Vascular smooth muscle cell foam cell formation and inhibited the expression of TLR4, MyD88, nuclear factor-κB, proinflammatory cytokines and ACAT1, whereas inhibition of PPARγ exerted the opposite effect.	info:pmid/25522268#abs:10
PPARG ---> MYD88	Expression	PPAR-γ antagonist GW decreased the telmisartan effect on the MyD88 expression.	info:pmid/26264163#body:106
PPARG ---> MYD88	Expression	PPAR-γ/IL-10 axis inhibits MyD88 expression and ameliorates murine polymicrobial sepsis.	info:pmid/24489087#title:1
PPARG ---> MYD88	Expression	PPAR-g agonists also suppress the expression of MyD88 signaling intermediates by primary microglia (Xu and Drew 2007).	info:pmid/19688333#cont:195
PPARG ---> MYD88	Expression	In addition, PPARγ, which is overexpressed in the brain in Alzheimer's disease patients, has been shown to inhibit microglial TLR4, CD14 and MyD88 expression and to down-regulate the release of pro-inflammatory cytokine ( ).	info:pmid/27255539#body:122
PPARG ---> MYD88	Expression	In addition, PPARγ, which is overexpressed in the brain in Alzheimer's disease patients, has been shown to inhibit microglial TLR4, CD14 and MyD88 expression and to down-regulate the release of pro-inflammatory cytokine ( ).	info:pmid/26526648#body:122
PPARG ---> MYD88	Expression	This clearly indicates that the activation of PPAR-γ by telmisartan may activate the SARM dependent down regulation of inflammation via attenuation of MyD88 dependent nuclear factor-κB expression in Lipopolysaccharide treated rats.	info:pmid/26264163#body:156
PPARG ---> MYD88	Expression	Activation of peroxisome proliferator-activated receptor γ (PPARγ) suppressed oxidized low-density lipoprotein-induced Vascular smooth muscle cell foam cell formation and inhibited the expression of TLR4, MyD88, nuclear factor-κB, proinflammatory cytokines and ACAT1, whereas inhibition of PPARγ exerted the opposite effect.	info:pmid/25522268#cont:15
PPARG ---> MYD88	Expression	PPAR gamma agonists directly inhibit MYD88 expression and NF-kappaB activity, leading to reduce neuroinflammation.	info:doi/10.21775/cimb.031.001#cont:192
PPARG ---> MYD88	Expression	A study from our laboratory showed that treatment with the PPARg agonist pioglitazone resulted in lower STAT1-dependent MyD88 expression and increased IL-10 levels in the serum, which reduced systemic inflammation after cecal ligation and puncture.	info:doi/10.1097/SHK.0000000000000778#cont:266
PPARG ---> RELA	Expression	Conversely, PPARγ activation by rosiglitazone at either low or high concentrations greatly (>75%) suppressed NFκB/p65 expression.	info:pmid/27292441#abs:8
PPARG ---> RELA	Expression	The activation of NF-κB p65 in the nuclear extract of cells was also significantly suppressed by Rosiglitazone, moreover, the expression of NF-κB p65 was partly activated by GW9662 (PPARγ antagonist).	info:pmid/21247645#abs:12
PPARG ---> RELA	Expression	The results showed that the PPAR-γ agonist pioglitazone decreased the expression of NF-κB p65 transcription target genes (e.g., IL-6, IL-1β, and TNF-α) and inhibited histological injury and inflammatory cells infiltration in cisplatin nephrotoxicity.	info:pmid/26673543#abs:4
PPARG ---> RELA	Expression	The promoter activity of miR-130a can be stimulated by NF-κB/p65, while PPARγ appeared to reduce the protein level of NF-κB/p65.	info:pmid/25595716#cont:287
PPARG ---> RELA	Expression	The protein expression of NF-κB p65 was significantly suppressed by PPARγ agonist, and partly activated by PPARγ antagonist.	info:pmid/21247645#body:108
PPARG ---> RELA	Expression	Moreover, it has been shown that the PPARγ ligand rosiglitazone can alter high-glucose-induced oxidative stress by reducing NF-κB/p65 activation and NOX4 expression .	info:pmid/24583459#body:107
PPARG ---> RELA	Expression	This indicated that the activation of Peroxisome proliferator-activated receptorγ by feeding ALA-rich linseed oil down-regulated eicosanoid pathway and also the transcription of NF-κB p65 and, thus, decreased the secretion of inflammatory mediators.	info:pmid/26830417#cont:560
PPARG ---> RELA	Expression	It has been reported previously that PPARγ protein can serve as an E3 ligase for NF-κB/p65, resulting in NF-κB/p65 protein ubiquitination and degradation, leading to the reduction of NF-κB/p65 and miR-130a promoter activity (Fig. 7I).	info:pmid/25595716#cont:368
PPARG ---> RELA	Expression	Administration of PPARγ-agonists-thiazolidinediones or Peroxisome proliferator-activated receptorγ expressing adenovirus reduced nuclear levels of the NF-κB subunit p65/RelA within mouse lungs exposed to the irritant ovalbumin ( ).	info:pmid/21645960#body:345
PPARG ---> RELA	Expression	We further observed that the PPARγ agonist, pioglitazone, reduced lipotoxicity induced by PA + FetA in βtotal cholesterol6 cells, and improved insulin secretion disorder, reduced apoptosis, decreased FetA and TLR4, p-JNK, NF-κB subunit P65 and cleaved caspase 3 expression, and increased GPR40 and PDX-1 expression of islet β cells in diet-induced obese rats.	info:pmid/25986658#body:96
PPARG ---> RELA	Expression	The results showed that PPAR-γ agonist pioglitazone decreased the expression of NF-κB p65 transcription target genes [e.g., the pro-inflammatory cytokines interleukin-6 (IL-6), interleukin-1b (IL-1b), and tumor necrosis factor-α (TNF-α)] and inhibited cell apoptosis and inflammatory cell infiltration in cisplatin nephrotoxicity.	info:doi/10.1016/j.hkjn.2015.09.026#body:3
myocardial infarction ---> ADIPOR2	QuantitativeChange	Of note, AdipoR1 and AdipoR2 expression was decreased following myocardial infarction .	info:doi/10.1016/j.ijcard.2011.07.047#body:97
myocardial infarction ---> ADIPOR2	QuantitativeChange	The expression levels of AdipoR1 and AdipoR2 are significantly reduced 4 to 8 weeks after myocardial infarction.	info:doi/10.1161/CIRCULATIONAHA.114.015248#cont:303
myocardial infarction ---> ADIPOR2	QuantitativeChange	It bears repeating that the expression levels of AdipoR1 and AdipoR2 are significantly reduced 4-8 weeks post-myocardial infarction.	info:doi/10.1016/j.tem.2017.03.004#body:99
PPARG ---> ACADM	Expression	PPARγ directly regulates mitochondrial β-oxidation by stimulating expression of the medium-chain acyl-CoA dehydrogenase (Mcad) gene, the promoter of which contains a functional PPRE (Gulick et al., 1994).	info:pmid/21347706#cont:192
PPARG ---> ACADM	Expression	Furthermore, the addition of the specific PPARγ antagonist T0070907 in combination with pioglitazone abolished the stimulatory effect of pioglitazone on MCAD and CPT-1 mRNA expression (Fig. 2[Go], B and C, respectively).	info:pmid/16204368#body:164
myocardial infarction ---> MYD88	QuantitativeChange	However, TLR1, TLR2, and MyD88 mRNA levels in Otsuka-Long-Evans-Tokushima fatty rats were significantly increased by myocardial infarction, and the levels were higher than those in Long-Evans-Tokushima-Otsuka rats with myocardial infarction.	info:pmid/28822965#cont:296
SOD1 ---> myocardial infarction	Regulation	Furthermore, the SOD1 overexpression in the paraventricular nucleus reduced cardiomyocyte size, collagen deposition and the TUNEL-positive cardiomyocytes in myocardial infarction rats.	info:pmid/22006090#abs:8
SOD1 ---> myocardial infarction	Regulation	Thus, SOD1 overexpression enhanced functional and metabolic recovery and greatly decreased myocardial infarction. [Figure 5] View larger version: In this window.	info:pmid/9539776#body:156
SOD1 ---> myocardial infarction	Regulation	... , over-expression of intracellular superoxide dismutase 1 (SOD1, Cu/Zn SOD) has been found to protect against ischemia in a mouse myocardial infarction ...	info:pmid/29228781#cont:261
SOD1 ---> myocardial infarction	Regulation	mutase 1 (SOD1) gene transfer into the Paraventricular nucleus attenuates sympathetic activity and hypertension in spontaneously hypertensive rats [38], and improves post-infarct myocardial remodeling and ventricular function in chronic heart failure rats [12].	info:pmid/24376743#cont:39
PPARG ---> SOD1	Expression	PPAR-gamma ligands also stimulated both activity and expression of Cu/Zn-SOD in human umbilical vein endothelial cell.	info:pmid/15590897#abs:9
PPARG ---> SOD1	Expression	The PPAR-gamma agonists promoted oligodendrocyte progenitor cell differentiation and enhanced their antioxidant defenses by increasing levels of catalase and copper-zinc superoxide dismutase while maintaining the overall homeostasis of the glutathione system.	info:pmid/19535992#abs:5
PPARG ---> SOD1	Expression	Because peroxisome proliferator-activated receptor gamma (PPARgamma) ligands reduced superoxide anion (O(2)(-.)) generation in vascular endothelial cells in vitro by reducing NADPH oxidase and increasing Cu/Zn superoxide dismutase expression, the current study examined the effect of PPARgamma ligands on vascular NADPH oxidase and O(2)(-.) generation in vivo.	info:pmid/17337254#abs:3
PPARG ---> SOD1	Expression	First, Conjugated linoleic acid isomer-mediated peroxisome proliferator-activated receptor-γ activation upregulates expression of Cu/Zn-superoxide dismutase.	info:pmid/19299109#body:150
PPARG ---> SOD1	Expression	peroxisome proliferators-activated receptorγ ligands stimulate both activity and expression of Cu/Zn-SOD (superoxide dismutase).	info:pmid/19800624#body:98
PPARG ---> SOD1	Expression	PPAR-γ agonists can increase superoxide dismutase 1 (SOD1)/catalase transcription, which accelerates the removal of existing Reactive oxygen species.	info:pmid/24352801#cont:36
PPARG ---> SOD1	Expression	Although the molecular basis for the PPAR-g ligand-induced increases in SOD activity,54,55 has not been defined, it seems that Cu/Zn-SOD gene expression may be stimulated directly by PPAR-g activation.56	info:pmid/22076494#cont:210
PPARG ---> SOD1	Expression	PPARγ ligands also produced coordinate reductions in endothelial NADPH oxidase expression and activity and increased Cu/Zn superoxide dismutase expression and activity (11).	info:pmid/19520921#body:74
PPARG ---> SOD1	Expression	PPARγ agonists also decrease the expression of Nox2 and NADPH oxidase 4 and significantly stimulate Cu/Zn SOD expression and activity in human umbilical vein endothelial cells .	info:pmid/22564529#body:404
PPARG ---> SOD1	Expression	Inoue et al21 showed that peroxisome proliferator-activated receptorγ activators increase (Cu,Zn)superoxide dismutase expression while decreasing p22phox message in human endothelial cells.	info:pmid/14638618#body:60
PPARG ---> SOD1	Expression	Additionally, enalapril treated rats show increased expression of the antioxidant enzymes catalase, Cu/Zn-SOD, manganese-superoxide dismutase and the hormone adiponectin, which are stimulated by PPARγ .	info:pmid/19549507#body:126
PPARG ---> SOD1	Expression	Alternatively, Inoue et al33 demonstrated that peroxisome proliferator-activated receptorγ ligands increased endothelial cell Cu/Zn superoxide dismutase mRNA levels and decreased PMA-stimulated p47phox expression.	info:pmid/12524224#body:173
PPARG ---> SOD1	Expression	[51] reported that neuronal PPARγ deficiency increased susceptibility to brain damage after cerebral ischemia through suppressing the expressions of Cu-Zn superoxide dismutase (SOD1), catalase , and glutathione S-transferase .	info:pmid/27287266#cont:323
PPARG ---> SOD1	Expression	Also, PPAR γ activators increase both activity and protein expression of Cu/Zn superoxide dismutase in human umbilical vein endothelial cells and mRNA expression of catalase in rat brain cells/microvascular endothelial cells .	info:pmid/19083475#body:177
PPARG ---> SOD1	Expression	Activation of Peroxisome proliferator-activated receptorγ induces expression of antioxidant catalase and copper/zinc superoxide dismutase , two enzymes capable of alleviating oxidative stress, and inhibiting NADPH oxidase (Dunning et al. 2013; Eslami et al. 2014; Zarzuelo et al.	info:pmid/28975471#cont:80
PPARG ---> SOD1	Expression	Moreover, activation of peroxisome proliferator-activated receptorγ induced the expression of copper/zinc-containing superoxide dismutase (Cu/Zn-superoxide dismutase), thereby accounting for the critical antioxidant role of these peroxisome proliferator-activated receptor subtypes .	info:pmid/21352808#body:19
PPARG ---> SOD1	Expression	In humans, this mitohormetic induction of glucose infusion rates is paralleled by, and may in part be due to, reactive oxygen species-related induction of PPARγ, PGC1α, and PGC1β, which then secondarily increase expression of reactive oxygen species-detoxifying enzymes, including SOD1, SOD2, and GPx1.	info:pmid/19433800#body:150
PPARG ---> SOD1	Expression	Additionally, a recent study has shown that peroxisome proliferator-activated receptorγ ligands (ciglitazone or 15-deoxy-Δ12,14-prostaglandin J2) stimulate both activity and expression of Cu/Zn-superoxide dismutase in human umbilical vein endothelial cells (Hwang et al., 2005[Go]), which is also consistent with the present data.	info:pmid/16352700#body:258
PPARG ---> SOD1	Expression	As mentioned above, recent studies suggest that PPARγ activation upregulates expression of the antioxidant enzymes Cu/Zn superoxide dismutase and catalase and maintains the equilibrium of the glutathione redox systems, which would mitigate the oxidative stress generated from oligodendrocyte precursor cell maturation-related metabolism ( ).	info:pmid/29032144#body:533
PPARG ---> SOD1	Expression	Although the molecular basis for the Peroxisome proliferator-activated receptor-γ ligand-induced increases in superoxide dismutase expression has not been defined, the identification of a functional PPRE in the Cu/Zn-superoxide dismutase promoter suggests that Cu/Zn-superoxide dismutase gene expression may be stimulated directly by Peroxisome proliferator-activated receptor-γ activation .	info:pmid/17349927#body:219
PPARG ---> SOD1	Expression	This speculation is supported by the finding that Peroxisome proliferator-activated receptor-γ activators increase Cu/Zn-superoxide dismutase expression in primary endothelial cells , and further supported by the finding of Hwang et al. that Peroxisome proliferator-activated receptor-γ ligands stimulate the activity and protein expression of Cu/Zn-superoxide dismutase in endothelial cells.	info:pmid/17349927#body:218
PPARG ---> SOD1	Expression	It has also been shown that: a) activators of PPARγ increase superoxide dismutase1 expression in endothelial cells, suggesting a PPARγ role as radical scavenger , and b) PPARγ expression is affected by oxidative stress in patients with metabolic syndrome, thus suggesting an association of a fall in PPARγ expression with oxidative stress and hypertriglyceridemia .	info:pmid/23085069#body:120
myocardial infarction ---> SOD1	QuantitativeChange	In this study, results showed that compared with control group, long-term potentiation was suppressed in dentate gyrus area, the contents of hydrogen peroxide (H2O2) and malondialdehyde were significantly increased, whereas the Cu/Zn-superoxide dismutase activity and N-methyl-d-aspartate receptor subunit 2B were attenuated in hippocampus of myocardial infarction rats.	info:pmid/24361546#abs:4
myocardial infarction ---> CAV1	QuantitativeChange	Both immunoblot analysis and immunohistochemistry dramatically show that Cav-1 and Cav-2 expression is downregulated to almost undetectable levels in the lungs of post-myocardial infarction rats.	info:pmid/15306231#abs:10

## Sheet: 30 Genes
geneName
CAV1
POU5F1
SOD1
HSPA1A
ADIPOQ
SNAI1
ADTRP
NR1H2
SFRP2
ADORA2A
PLIN5
BDNF
ANGPT1
ATP2A2
THPO
MIR29C
HSPB1
ABCG2
NOS1
MIR424
MRC1
C1QTNF9
NRP1
APOA4
SDC1
NPY
ANXA1
PHB
HMOX1
MIR145

## Sheet: 125 Genes
geneName
ACTA2
CXCL10
ACADM
PTGS2
ALB
CAV1
RELA
CCL2
TNF
ADIPOR2
TGFB1
MYD88
SOD1
PAPPA
CXCL1
GPX1
CXCL2
IGFBP3
CSF3
CCL5
NFATC3
DCN
FLT4
TRPV4
RETN
CSF1
NOTCH4
THBS1
SMAD2
F2RL1
TWIST1
GZMB
GLO1
CTSS
MMP9
LEP
IL6
TNFSF10
RHOA
NLRP3
SELP
CTGF
TNFRSF1B
NGB
TLR2
PGF
IL1RL1
GSK3B
ESRRA
CCR7
KL
SCARB1
VEGFC
ACE
BGLAP
CYP11B2
PDGFRA
COL4A2
MERTK
IGF1R
MMP12
MMP13
ELAVL1
ATP2A2
CD36
PRL
CAV2
IL1A
JAG1
LOX
OLR1
CCL3
ICAM1
F3
MMP3
IL2
NOS2
COL1A1
C1QTNF9
CXCL8
NOX4
PON1
DIO2
SMAD7
ADAMTS4
CX3CL1
VIM
RAC1
AHSG
CREB1
HBEGF
ACADL
CXCR4
IL17A
HMGB1
CYBA
EDN1
AGER
MAS1
FADS1
AQP1
CRP
EPHX2
BCAT2
CXCL9
IFNG
TNFRSF11B
SELE
PDGFRB
PLAT
AGT
TRPC6
CXCL5
LPAR3
S100B
MMP2
GCG
NPPB
CCL11
IL1B
ANGPTL3
NR1H3
RGS5
TSLP

## Sheet: Mega-analysis
Gene Name	Is Random-Effects Model	Number of Study	Absolute z-value	Log fold change (LFC)	standard diviation of LFC (mSE)	Lower limite of LFC (LL) 95%confidence interval	Upper limite of LFC (UL) 95%confidence interval	z-value	p-value	Percentage of within-study variance (Isq)	PValue_Q (p-value of no between-study variance)	MLR-pevalue for Constant	MLR-pevalue for Sample size	MLR-pevalue for Country	MLR-pevalue for Study Age
ACADM	0	6	2.70933	-0.324746	0.119862	-0.559675	-0.0898159	-2.70933	0.003371	0	0.992011	0.503201	0.00562083	0.000328875	0.99328
ADIPOR2	0	6	1.86904	-0.160177	0.0856999	-0.328148	0.00779518	-1.86904	0.0308086	0	0.658312	0.499336	0.222414	0.000620569	0.998745
ALB	1	6	2.5937	-1.35318	0.521719	-2.37575	-0.330614	-2.5937	0.00474745	91.3011	4.02891e-11	0.501896	0.404089	0.0217024	0.0031134
CAV1	0	7	2.54978	-0.243204	0.0953824	-0.430154	-0.0562544	-2.54978	0.00538959	0	0.449473	0.501195	0.115462	0.0130496	0.0693776
MYD88	0	3	1.6731	0.227634	0.136055	-0.039035	0.494302	1.6731	0.0471543	0	0.689861	0.5	1.11022e-16	0	1
PPARG	0	5	5.89811	-0.515307	0.0873682	-0.686548	-0.344065	-5.89811	1.8385e-09	16.7145	0.308141	0.943384	1	6.75228e-11	5.27652e-10
RELA	0	4	2.42152	0.274642	0.113417	0.0523444	0.496939	2.42152	0.00772783	0	0.906202	0	0	0	1
SOD1	0	4	1.66091	-0.281015	0.169194	-0.612635	0.0506046	-1.66091	0.048366	0	0.789464	0	0	0	1
POU5F1	1	5	1.7426	-0.226533	0.129997	-0.481327	0.0282609	-1.7426	0.0407014	71.225	0.00761792	0.999898	1	1.87611e-09	2.10276e-13

## Sheet: GSEA
Name	# of Entities	GO ID	Overlap	Percent Overlap	p-value	Jaccard similarity	Overlapping Entities	Hit type	p-value_beforeFDR	crit-p	beSignificant
GO: response to nutrient	370	0007584;	7	1	2.94019e-07	0.0188172	PPARG;ADIPOR2;ACADM;ALB;CAV1;RELA;SOD1	GO: biological_process	7.303e-12	6.48758e-07	TRUE
GO: response to nutrient levels	730	0031667;	7	0	1.526e-05	0.00956284	PPARG;ADIPOR2;ACADM;ALB;SOD1;CAV1;RELA	GO: biological_process	8.50895e-10		TRUE
GO: response to extracellular stimulus	761	0009991;	7	0	1.526e-05	0.00917431	PPARG;ADIPOR2;ACADM;ALB;SOD1;CAV1;RELA	GO: biological_process	1.13711e-09		TRUE
GO: response to inorganic substance	803	0010035;	6	0	0.00112656	0.00744417	PPARG;ACADM;ALB;CAV1;RELA;SOD1	GO: biological_process	1.11928e-07		TRUE
GO: regulation of small molecule metabolic process	422	0062012;	5	1	0.00163187	0.0117371	PPARG;ADIPOR2;ACADM;SOD1;CAV1	GO: biological_process	2.04039e-07		TRUE
GO: regulation of lipid metabolic process	441	0019216;	5	1	0.00163187	0.011236	PPARG;ADIPOR2;ACADM;SOD1;CAV1	GO: biological_process	2.53874e-07		TRUE
GO: cellular response to external stimulus	451	0071496;	5	1	0.00163187	0.010989	PPARG;ALB;SOD1;MYD88;CAV1	GO: biological_process	2.83733e-07		TRUE
GO: response to metal ion	533	0010038;	5	0	0.00326488	0.00931099	PPARG;ACADM;ALB;SOD1;CAV1	GO: biological_process	6.48758e-07		TRUE

## Sheet: PPI
Entity1 Name	Relation Relation	Relation Object Type	Relation Effect	Relation # of Total References	Relation PMID	Relation Sentence	Relation Title	Entity2 Name
PPARG	Binding: PPARG ---- RELA	Binding		21	28336257;28506911;15925327;16499875;11755002;23684777;25305479;25725372;26883505;26939761;17312272;19454652;16227525;20622120;23762140;24975470;23250430;23684777;14587029;18556801;17312272;29397559	Other report indicated that PPAR-Î³ also physically interacts with the nuclear factor-ÎºB subunit p65 and promotes p65 nuclear export to suppress nuclear factor-ÎºB-driven transcription . ;Moreover, PPAR-Î³ interacts negatively with the transcription factor NF-ÎºB p65 (pS536) and suppresses the expression of inflammatory cytokines, such as IL-1Î², IL-6, as well as the infiltration of neutrophils …	A novel pyrazole-containing indolizine derivative suppresses NF-ÎºB activation and protects against TNBS-induced colitis via a PPAR-Î³-dependent pathway;Mangiferin protects against â€­intestinal ischemia/reperfusion-induced â€­liver injury: â€¬â€¬Involvement of PPAR-â€­Î³, GSK-3Î² and Wnt/Î²-catenin pathwayâ€¬â€¬â€¬â€¬â€¬â€¬â€¬â€¬â€¬â€¬â€¬â€¬â€¬â€¬â€¬â€¬â€¬â€¬â€¬â€¬â€¬â€¬â€¬â€¬â€¬â€¬â€¬â€¬â€¬â€¬â…	RELA
CAV1	DirectRegulation: CAV1 ---> POU5F1	DirectRegulation	unknown	2	29986880;29986880	Site-directed mutagenesis and computational modeling studies revealed that the hydroxyl moiety at tyrosine 14 of Cav-1 is crucial for its interaction with Oct4. ;We further found that the tyrosine residue at position 14 of Cav-1 is required for its interaction with Oct4, i.e. via H-bonding possibly between the H-bond donor OH-tyrosine 14 and H-bond acceptor that resides in Oct4. ;These results cl…	Nitric oxide promotes cancer cell dedifferentiation by disrupting an Oct4:caveolin-1 complex: A new regulatory mechanism for cancer stem cell formation.;Nitric oxide promotes cancer cell dedifferentiation by disrupting an Oct4:caveolin-1 complex: A new regulatory mechanism for cancer stem cell formation;Nitric oxide promotes cancer cell dedifferentiation by disrupting an Oct4:caveolin-1 complex: …	POU5F1
ALB	DirectRegulation: ALB ---> SOD1	DirectRegulation	unknown	3	18764780;18764780;26496610;16807121	In the absence of DTPA, the SOD1/HSA/H2O2 reaction in BB produced greater oxidative damage, mainly to side-chain residues (Table 1), than that in PB, as demonstrated by increases in DMPO-trappable SOD1 radicals and SOD1 inactivation (Figures 1A and 1B).;We observed that HSA blocked H2O2-induced SOD1 self-inactivation in BB, but in PB it had no effect (Figure 2A).;Thus, it is possible that peak II…	Cu,Zn-superoxide dismutase-driven free radical modifications: copper- and carbonate radical anion-initiated protein radical chemistry.;Cu,Zn-superoxide dismutase-driven free radical modifications: copper- and carbonate radical anion-initiated protein radical chemistry.;A human interactome in three quantitative dimensions organized by stoichiometries and abundances.;Up-regulation of an extracellul…	SOD1
RELA	Expression: RELA ---> CAV1	Expression	unknown	2	18077459;19351910	F, p65/RelA knockdown prevents lipopolysaccharide-induced Cav-1 expression in endothelial cells. ;We have shown recently that lipopolysaccharide-induced caveolin-1 expression in human lung microvessel endothelial cells is mediated by p65/RelA binding to the intronic NF-ÎºB enhancer sequence (37).	Role of NF-kappaB-dependent caveolin-1 expression in the mechanism of increased endothelial permeability induced by lipopolysaccharide.;NF-kappaB regulates thrombin-induced ICAM-1 gene expression in cooperation with NFAT by binding to the intronic NF-kappaB site in the ICAM-1 gene.	CAV1
PPARG	positive Expression: PPARG --+> ACADM	Expression	positive	3	16204368;21347706	Furthermore, the addition of the specific PPARÎ³ antagonist T0070907 in combination with pioglitazone abolished the stimulatory effect of pioglitazone on MCAD and CPT-1 mRNA expression (Fig. 2[Go], B and C, respectively). ;PPARÎ³ directly regulates mitochondrial Î²-oxidation by stimulating expression of the medium-chain acyl-CoA dehydrogenase (Mcad) gene, the promoter of which contains a function…	Structural and functional consequences of mitochondrial biogenesis in human adipocytes in vitro.;Identification of the target proteins of rosiglitazone in 3T3-L1 adipocytes through proteomic analysis of cytosolic and secreted proteins	ACADM
PPARG	positive Expression: PPARG --+> POU5F1	Expression	positive	3	23998797;23998797;23998797;23998797;23998797;23998797;23998797;23998797;23998797;23998797;23998797	... PPARg activators or overexpression of PPARg in human adipose tissue-derived stem cells at passage 20 could recover Oct4 expression levels and increase Oct4 ...;PPARg inactivation by GW9662 inhibited the troglitazone-induced Oct4 mRNA expression. ;Regulation of Oct4 gene expression level by PPARÎ³;These data provide evidence that PPARg directly increases transcription of the Oct4 gene. ;... PP…	Differentiation Potential and Profile of Nuclear Receptor Expression during Expanded Culture of Human Adipose Tissue-Derived Stem Cells Reveals PPARÎ³ as an Important Regulator of Oct4 Expression;Differentiation Potential and Profile of Nuclear Receptor Expression during Expanded Culture of Human Adipose Tissue-Derived Stem Cells Reveals PPARÎ³ as an Important Regulator of Oct4 Expression;Differe…	POU5F1
POU5F1	Expression: POU5F1 ---> SOD1	Expression	unknown	1	29933066;29933066;29933066;29933066	Superoxide dismutase 1 expression is modulated by the core pluripotency transcription factors Oct4, Sox2 and Nanog in embryonic stem cells. ;Moreover, Oct4, Sox2 and Nanog induced Sod1 promoter activity, revealing a relationship between the pluripotency core transcription factors and redox homeostasis. ;These results are in concordance with the above observations and led us to conclude that the p…	Superoxide dismutase 1 expression is modulated by the core pluripotency transcription factors Oct4, Sox2 and Nanog in embryonic stem cells.;Superoxide dismutase 1 expression is modulated by the core pluripotency transcription factors Oct4, Sox2 and Nanog in embryonic stem cells;Superoxide dismutase 1 expression is modulated by the core pluripotency transcription factors Oct4, Sox2 and Nanog in em…	SOD1
CAV1	positive Expression: CAV1 --+> RELA	Expression	positive	1	26503358;26503358	Cav-1 siRNA transfection inhibited the protein expression of Notch-1, p-Akt and p-NF-ÎºB p65 in the cisplatin-resistant ovarian cancer.;The results showed that the knockdown of Cav-1 significantly downregulated the protein expression level of Notch-1, p-Akt and p-NF-ÎºB p65 (P<0.05, Fig. 5).	Caveolin-1 mediates chemoresistance in cisplatin-resistant ovarian cancer cells by targeting apoptosis through the Notch-1/Akt/NF-ÎºB pathway;Caveolin-1 mediates chemoresistance in cisplatin-resistant ovarian cancer cells by targeting apoptosis through the Notch-1/Akt/NF-ÎºB pathway	RELA
RELA	positive Expression: RELA --+> SOD1	Expression	positive	4	27255468;22397926;25996379	They showed that NF-ÎºB-p65 in renal cells increased the expression of antioxidant enzymes (GPx1, SOD1), enhanced the ability of Nrf2 to increase GST-M1 protein expression, and reduced the cellular reactive oxygen species levels [230]. ;Our present study clearly demonstrates that NF-ÎºB-p65 in renal cells increases the expression of antioxidant enzymes (GPx1, SOD-1) and enhances the ability of Nr…	Novel insights into redox system and the mechanism of redox regulation;Novel role of NF-ÎºB-p65 in antioxidant homeostasis in human kidney-2 cells;A central role for JNK/AP-1 pathway in the pro-oxidant effect of pyrrolidine dithiocarbamate through superoxide dismutase 1 gene repression and reactive oxygen species generation in hematopoietic human cancer cell line U937	SOD1
ALB	positive Expression: ALB --+> RELA	Expression	positive	1	11723063;11723063	advanced glycosylation end product-albumin induces accumulation of NF-ÎºBp65 mRNA and de novo synthesis of NF-ÎºBp65 antigen in endothelial cells. ;Specificity of oligonucleotides was confirmed in immunoblot experiments, which demonstrated reduction of advanced glycosylation end product-albumin-induced NF-ÎºBp65 expression, but not of NF-ÎºBc-Rel expression in the presence of antisense p65 oligon…	Diabetes-associated sustained activation of the transcription factor nuclear factor-kappaB.;Diabetes-associated sustained activation of the transcription factor nuclear factor-kappaB.	RELA
CAV1	Expression: CAV1 ---> POU5F1	Expression	unknown	3	20110442;20110442;20110442;20110442;29986880	Oct4 protein expression was decreased by caveolin-1 small interfering RNAs in a dose-dependent manner ( Fig. 4B ), but Oct4 protein expression was not influenced by control small interfering RNAs ( Fig. 4C ). ;In the absence of Nitric oxide, Oct4 forms a molecular complex with Cav-1, which promotes the ubiquitin-mediated protea-somal degradation of Oct4. ;As shown in Fig. 4Eâ€“H , mRNA expression…	Lipid rafts play an important role for maintenance of embryonic stem cell self-renewal;Nitric oxide promotes cancer cell dedifferentiation by disrupting an Oct4:caveolin-1 complex: A new regulatory mechanism for cancer stem cell formation;Lipid rafts play an important role for maintenance of embryonic stem cell self-renewal;Lipid rafts play an important role for maintenance of embryonic stem cell…	POU5F1
PPARG	positive Expression: PPARG --+> ADIPOR2	Expression	positive	18	20696134;18442481;18789331;17532004;16483885;18555836;27216461;16306350;16306350;18755807;17142348;23589922;18054196;21514306;28837879;20363289;18755807;21514306	LXR agonists increased the expression of AdipoR1and AdipoR2 in human macrophages, whereas agonists of PPARÎ± and PPARÎ³ only increased the expression of AdipoR2 . ;Oral medication like PPARÎ± and PPARÎ³ agonists, that influence adiponectin receptor 2 mRNA most likely do not explain elevated expression of both receptors because, at least in the obese controls, these drugs have not been applied. ;W…	ATF3 negatively regulates adiponectin receptor 1 expression;Reduced response to adiponectin and lower abundance of adiponectin receptor proteins in type 2 diabetic monocytes;Negative regulation of adiponectin receptor 1 promoter by insulin via a repressive nuclear inhibitory protein element;Adiponectin and its receptors are expressed in adult ventricular cardiomyocytes and upregulated by activati…	ADIPOR2
PPARG	positive Expression: PPARG --+> SOD1	Expression	positive	22	29032144;21352808;19800624;19083475;17349927;17349927;19299109;22564529;23085069;16352700;19520921;19433800;14638618;12524224;27287266;28975471;24352801;22076494;15590897;17337254;19535992;19549507	As mentioned above, recent studies suggest that PPARÎ³ activation upregulates expression of the antioxidant enzymes Cu/Zn superoxide dismutase and catalase and maintains the equilibrium of the glutathione redox systems, which would mitigate the oxidative stress generated from oligodendrocyte precursor cell maturation-related metabolism ( ). ;Moreover, activation of peroxisome proliferator-activat…	Peroxisome proliferator-activated receptor Î³ (PPARÎ³): A master gatekeeper in CNS injury and repair;Transcriptional up-regulation of antioxidant genes by PPARÎ´ inhibits angiotensin II-induced premature senescence in vascular smooth muscle cells;Combination therapy for treatment or prevention of atherosclerosis: Focus on the lipid-RAAS interaction;Î±-Tocopherol modulates human umbilical vein end…	SOD1
PPARG	negative Expression: PPARG ---| MYD88	Expression	negative	11	26264163;26264163;26526648;27255539;19688333;17237441;24489087;24489087;26264163;25522268;25522268	PPAR-Î³ antagonist GW decreased the telmisartan effect on the MyD88 expression.;This clearly indicates that the activation of PPAR-Î³ by telmisartan may activate the SARM dependent down regulation of inflammation via attenuation of MyD88 dependent nuclear factor-ÎºB expression in Lipopolysaccharide treated rats. ;In addition, PPARÎ³, which is overexpressed in the brain in Alzheimer's disease pati…	Telmisartan mediates anti-inflammatory and not cognitive function through PPAR-Î³ agonism via SARM and MyD88 signaling;Telmisartan mediates anti-inflammatory and not cognitive function through PPAR-Î³ agonism via SARM and MyD88 signaling;Microglial toll-like receptors and Alzheimer's disease;Reprint of: Microglial toll-like receptors and Alzheimer's disease;Diabetes mellitus and sepsis: A challen…	MYD88
RELA	positive Expression: RELA --+> CAV1	Expression	positive	3	18077459;18077459;18077459;19351910;18077459	Knockdown of NF-ÎºB subunit p65/RelA expression with small interfering RNA also prevented lipopolysaccharide-induced Cav-1 expression. ;F, p65/RelA knockdown prevents lipopolysaccharide-induced Cav-1 expression in endothelial cells. ;Knockdown of p65/RelA expression utilizing small interference RNA also prevented lipopolysaccharide-induced Cav-1 expression. ;We have shown recently that lipopolysa…	Role of NF-kappaB-dependent caveolin-1 expression in the mechanism of increased endothelial permeability induced by lipopolysaccharide.;Role of NF-kappaB-dependent caveolin-1 expression in the mechanism of increased endothelial permeability induced by lipopolysaccharide.;Role of NF-kappaB-dependent caveolin-1 expression in the mechanism of increased endothelial permeability induced by lipopolysac…	CAV1
SOD1	Expression: SOD1 ---> ALB	Expression	unknown	5	20348042;18836000;18378695;18573333	Production of human serum albumin nitrone adducts was also dependent on (bi)sulfite and Cu,Zn-superoxide dismutase concentrations; only 500 ÂµM (bi)sulfite was sufficient to detect positive results on the anti-5,5-dimethyl-1-pyrroline N-oxide Western blots, whereas (bi)sulfite concentration in wines, where it is used as a preservative, is 6 mM (Gunnison 1981).;We found that overexpression of the …	(Bi)sulfite oxidation by copper, zinc-superoxide dismutase: Sulfite-derived, radical-initiated protein radical formation.;SOD1, a new Kluyveromyces lactis helper gene for heterologous protein secretion.;Evidence for a superoxide permeability pathway in endosomal membranes.;Role of copper,zinc-superoxide dismutase in catalyzing nitrotyrosine formation in murine liver	ALB
CAV1	Expression: CAV1 ---> MYD88	Expression	unknown	5	26514084;20601931;20601931;26223660;25228491	Loss of Cav-1 reduced the expression of CD14, CD36, TLR4 and MYD88, which prevented phagocytosis and the production of inflammatory cytokines.15 ;Furthermore, deletion of Cav-1 attenuated the expression of Toll-like receptor 4 and myeloid differentiation factor 88 and the activation of nuclear factor ÎºB, all of which impeded the production of inflammatory cytokines in response to bacterial expos…	Caveolin-1 regulates osteoclast differentiation by suppressing cFms degradation;Impaired Cd14 and Cd36 expression, bacterial clearance, and Toll-like receptor 4-Myd88 signaling in caveolin-1-deleted macrophages and mice.;Impaired Cd14 and Cd36 expression, bacterial clearance, and Toll-like receptor 4-Myd88 signaling in caveolin-1-deleted macrophages and mice.;Flagellin-dependent TLR5/caveolin-1 a…	MYD88
ALB	Expression: ALB ---> RELA	Expression	unknown	6	11723063;11723063;15389529;24732014;19524415;18160626	advanced glycosylation end product-albumin induces accumulation of NF-ÎºBp65 mRNA and de novo synthesis of NF-ÎºBp65 antigen in endothelial cells. ;Specificity of oligonucleotides was confirmed in immunoblot experiments, which demonstrated reduction of advanced glycosylation end product-albumin-induced NF-ÎºBp65 expression, but not of NF-ÎºBc-Rel expression in the presence of antisense p65 oligon…	Diabetes-associated sustained activation of the transcription factor nuclear factor-kappaB.;Diabetes-associated sustained activation of the transcription factor nuclear factor-kappaB.;Effect of albumin on 14C-alpha-Methyl-D-Glucopyranoside uptake in primary cultured renal proximal tubule cells: involvement of PLC, MAPK, and NF-kappaB.;Oleate prevents palmitate-induced mitochondrial dysfunction, i…	RELA
CAV1	positive Expression: CAV1 --+> POU5F1	Expression	positive	3	20110442;20110442;20110442;20110442;29986880	Oct4 protein expression was decreased by caveolin-1 small interfering RNAs in a dose-dependent manner ( Fig. 4B ), but Oct4 protein expression was not influenced by control small interfering RNAs ( Fig. 4C ). ;As shown in Fig. 4Eâ€“H , mRNA expression levels of Oct4, Sox2, FoxD3, and Rex1 were significantly decreased by methyl-Î²-cyclodextrin and caveolin-1 small interfering RNAs. ;Correspondingl…	Lipid rafts play an important role for maintenance of embryonic stem cell self-renewal;Lipid rafts play an important role for maintenance of embryonic stem cell self-renewal;Lipid rafts play an important role for maintenance of embryonic stem cell self-renewal;Lipid rafts play an important role for maintenance of embryonic stem cell self-renewal.;Nitric oxide promotes cancer cell dedifferentiatio…	POU5F1
PPARG	negative Expression: PPARG ---| RELA	Expression	negative	10	21247645;21645960;25986658;26830417;25595716;25595716;21247645;26673543;27292441;24583459	The protein expression of NF-ÎºB p65 was significantly suppressed by PPARÎ³ agonist, and partly activated by PPARÎ³ antagonist. ;Administration of PPARÎ³-agonists-thiazolidinediones or Peroxisome proliferator-activated receptorÎ³ expressing adenovirus reduced nuclear levels of the NF-ÎºB subunit p65/RelA within mouse lungs exposed to the irritant ovalbumin ( ). ;We further observed that the PPARÎ…	Rosiglitazone suppresses lipopolysaccharide-induced matrix metalloproteinase-2 activity in rat aortic endothelial cells via Ras-MEK1/2 signaling;PPARÎ³: A molecular link between systemic metabolic disease and benign prostate hyperplasia;Fetuin A promotes lipotoxicity in Î² cells through the TLR4 signaling pathway and the role of pioglitazone in anti-lipotoxicity;Peroxisome Proliferator-activated …	RELA
RELA	Expression: RELA ---> PPARG	Expression	unknown	3	26211973;26211973;25887780;25305479	Based on the previous discovery that advanced glycation end products induced PPARÎ³ downregulation in human OA chondrocytes via RAGE and NF-ÎºB activation ( ), we hypothesized that NF-ÎºB p65 and RAGE activation in diabetic mice would lead to a decrease in PPARÎ³ level at the blood-brain barrier, whereas treatment with antidiabetic drugs would reverse this change. ;Based on the previous discovery…	Antidiabetic drugs restore abnormal transport of amyloid-Î² across the blood-brain barrier and memory impairment in db/db mice;Antidiabetic drugs restore abnormal transport of amyloid-Î² across the blood-brain barrier and memory impairment in db/db mice;Global gene expression profiling of brown to white adipose tissue transformation in sheep reveals novel transcriptional components linked to adip…	PPARG
CAV1	negative Expression: CAV1 ---| SOD1	Expression	negative	2	28440485;28440485;28440485;28440485;28440485;28440485;28440485;28440485;29746866	Previous reports have shown that Cav1 mediates the degradation of several proteins (19-21), thus it is possible that Cav1 promotes the degradation of SOD1.;Cav1 may be involved in the lysosome-mediated degradation of SOD1.;In the present study, the increased protein level of Cav1 was negatively correlated with the expression of SOD1, and the overexpression of Cav1 significantly suppressed the pro…	Sclareol inhibits cell proliferation and sensitizes cells to the antiproliferative effect of bortezomib via upregulating the tumor suppressor caveolin-1 in cervical cancer cells;Sclareol inhibits cell proliferation and sensitizes cells to the antiproliferative effect of bortezomib via upregulating the tumor suppressor caveolin-1 in cervical cancer cells;Sclareol inhibits cell proliferation and se…	SOD1
MYD88	positive MolTransport: MYD88 --+> RELA	MolTransport	positive	11	26318197;17167049;27158204;24489660;22931316;26510639;25522268;23015711;21383499;28459433	Our studies have shown that TLR4, MyD88, TGF-Î²1 expression and NF-ÎºB p65 nuclear translocation increased in model rats, but Art treatment downregulated TLR4, MyD88, TGF-Î²1 expression and even suppressed downstream signaling through NF-ÎºB p65 nuclear translocation. ;To begin, we focused on the MyD88-Mal branch of TLR4 signaling, which results in nuclear translocation of NF-ÎºB-p65 and activati…	Artesunate alleviates hepatic fibrosis induced by multiple pathogenic factors and inflammation through the inhibition of LPS/TLR4/NF-ÎºB signaling pathway in rats;Combinatorial pattern recognition receptor signaling alters the balance of life and death in macrophages.;Molecular consequences of proprotein convertase 1/3 (PC1/3) inhibition in macrophages for application to cancer immunotherapy: A p…	RELA
PPARG	MolTransport: PPARG ---> RELA	MolTransport	unknown	5	17324587;26773728;24352801;29908243;30930772	Interestingly, the commensal anaerobe Bacteroides thetaiotaomicron induces peroxisome proliferator-activated receptor gamma expression, and was found to induce peroxisome proliferator-activated receptor gamma-dependent shuttling of the RelA subunit of the NF-ÎºB transcription factor, from the nucleus to the cytosolic compartment. ;The present study showed that rosiglitazone, which activated place…	The intestinal epithelial barrier: How to distinguish between the microbial flora and pathogens;Rosiglitazone pretreatment protects against lipopolysaccharide-induced fetal demise through inhibiting placental inflammation;15-Deoxy-âˆ†12,14-PGJ2, by Activating Peroxisome Proliferator-Activated Receptor-Gamma, Suppresses p22phox Transcription to Protect Brain Endothelial Cells Against Hypoxia-Induc…	RELA
PPARG	positive PromoterBinding: PPARG --+> ALB	PromoterBinding	positive	3	19932685;20529675;20529675;20529675;19932685;19932685;19932685;19932685;19932685;19932685	No significant binding of PPAR-Î³ to the albumin promoter was detected (data not shown). ;No significant binding of PPAR-Î³ to the albumin promoter was detected (data not shown). ;Although further study should be needed to elucidate detailed molecular mechanisms, our findings suggest that CCAAT/enhancer-binding protein-Î² may act as a positive regulator in PPAR-Î³ or CCAAT/enhancer-binding protei…	Albumin mediates PPAR-Î³ or C/EBP-Î±-induced phenotypic changes in pancreatic stellate cells;Albumin expression is required for adipocyte differentiation of 3T3-L1 cells;Albumin expression is required for adipocyte differentiation of 3T3-L1 cells;Albumin expression is required for adipocyte differentiation of 3T3-L1 cells;Albumin mediates PPAR-Î³ or C/EBP-Î±-induced phenotypic changes in pancreat…	ALB
PPARG	PromoterBinding: PPARG ---> CAV1	PromoterBinding	unknown	12	17764562;15314095;22474125;24594319;20368353;20368353;18507034;17764562;15314095;12813462	peroxisome proliferator-activated receptor-Î³ binds to response elements in the caveolin-1 promoter and triggers caveolin-1 transcription [18,50].;This suggests that the effect of rosiglitazone on cav-1 expression may be mediated by transcription activation upon binding of PPARÎ³/RXR heterodimers to the newly identified peroxisome proliferator response element in the promoter of the cav-1 gene. ;…	1,1-Bis(3'-indolyl)-1-(p-biphenyl)methane inhibits basal-like breast cancer growth in athymic nude mice.;Rosiglitazone upregulates caveolin-1 expression in THP-1 cells through a PPAR-dependent mechanism.;Bile acids down-regulate caveolin-1 in esophageal epithelial cells through sterol responsive element-binding protein;TNF-Î± promotes early atherosclerosis by increasing transcytosis of LDL across…	CAV1
PPARG	positive PromoterBinding: PPARG --+> CAV1	PromoterBinding	positive	11	17764562;12813462;15314095;22474125;18507034;15314095;17764562;24594319;20368353;15798084;16505105;16731770;22474125;12813462;18507034;15314095;17764562;24594319;20368353;15798084;16505105;16731770;20368353;12813462	peroxisome proliferator-activated receptor-Î³ binds to response elements in the caveolin-1 promoter and triggers caveolin-1 transcription [18,50].;Caveolin-1 mRNA levels were found to be upregulated by PPARgamma ligands already after 3 h in both the cell lines. ;This suggests that the effect of rosiglitazone on cav-1 expression may be mediated by transcription activation upon binding of PPARÎ³/RX…	1,1-Bis(3'-indolyl)-1-(p-biphenyl)methane inhibits basal-like breast cancer growth in athymic nude mice.;Peroxisome proliferator-activated receptor-gamma upregulates caveolin-1 and caveolin-2 expression in human carcinoma cells.;Rosiglitazone upregulates caveolin-1 expression in THP-1 cells through a PPAR-dependent mechanism.;Bile acids down-regulate caveolin-1 in esophageal epithelial cells thro…	CAV1
ALB	Regulation: ALB ---> PPARG	Regulation	unknown	13	27430988;18832575;15629510;15629510;23058985;23058985;23058985;23058985;23058985;23058985;11159824;11159824;11159824;11159824;11159824;11159824;12006382;23108012;23108012;23108012;23108012;23108012;23108012;23108012;23108012;23108012;23108012;23108012;23108012;11159824;11159824;12506134;15629510;23108012;19932685;19932685;19932685;20529675	As the 50% effective concentration for Peroxisome proliferator-activated receptor-Î³ activation is reported to be 1-10 Î¼M , 1 Î¼M of telmisartan at 3.0% albumin might be too low to activate Peroxisome proliferator-activated receptor-Î³. ;Also, in cultured proximal tubular cells , free fatty acid-bound albumin induced apoptosis by activating peroxisome proliferator activated receptor -Î³. ;Intere…	Effects of telmisartan and olmesartan on insulin sensitivity and renal function in spontaneously hypertensive rats fed a high fat diet;Lipid Droplet-Associated Proteins Protect Renal Tubular Cells from Fatty Acid-Induced Apoptosis;The selective cyclooxygenase-2 inhibitor celecoxib modulates the formation of vasoconstrictor eicosanoids and activates PPARÎ³. Influence of albumin;The selective cyclo…	PPARG
MYD88	positive Regulation: MYD88 --+> SOD1	Regulation	positive	2	18534912	Moreover, inhibiting pro-inflammatory signaling (e.g., MyD88) in bone marrow-derived microglia might dramatically accelerate disease progression in SOD1 (G37R) mice (Kang and Rivest, submitted).	Immunotherapy for neurological diseases	SOD1
ALB	positive Regulation: ALB --+> CAV1	Regulation	positive	22	21497382;21035530;18003990;23416119;23639804;24071503;26875112;26851257;20148685;21041450;22292808;26646098;27510034;17897637;19027754;22917779;10973995;20148685	Albumin binds to gp60 and activates CAV1 which induces caveoli formation .;Albumin binding to gp60 activates caveolin-1 and results in the formation of caveoli, which transport albumin and other plasma constituents across endothelial cells. ;Binding of albumin to its glycoprotein 60 receptor on the surface of endothelial cells activates caveolin-1, resulting in the formation of vesicles called ca…	A phase II evaluation of nanoparticle, albumin-bound (nab) paclitaxel in the treatment of recurrent or persistent platinum-resistant ovarian, fallopian tube, or primary peritoneal cancer: A Gynecologic Oncology Group Study;Preparation and characterization of water-soluble albumin-bound curcumin nanoparticles with improved antitumor activity;Feasibility and Efficacy of Percutaneous Transcatheter I…	CAV1
CAV1	positive Regulation: CAV1 --+> ALB	Regulation	positive	19	17897637;19027754;23246481;24326256;15292187;11724808;12689915;19940036;20148685;23723070;25635824;19656258;19656258;25461293;27572515;29563255;30012492;31927252	Evidence has accumulated suggesting that caveolin-1 regulates endothelial transcellular transport of albumin. ;Evidence has accumulated suggesting that caveolin-1 regulates endothelial transcellular transport of albumin in that caveolin-1 null mice have no caveolae and defective uptake and transport of albumin, which can be rescued by re-introduction of caveolin-1 cDNA ( ). ;Knockdown of cav-1 al…	Regulation of endothelial permeability by Src kinase signaling: Vascular leakage versus transcellular transport of drugs and macromolecules;Regulation of transendothelial permeability by Src Kinase;Wogonin inhibits H2O2-induced vascular permeability through suppressing the phosphorylation of caveolin-1;Loss of Caveolin-1 Causes Blood-Retinal Barrier Breakdown, Venous Enlargement, and Mural Cell A…	ALB
CAV1	Regulation: CAV1 ---> PPARG	Regulation	unknown	7	15811424;26259513;29351409;29351409;29351409;29351409;29351409;21690289;21690289;21690289;21690289;21690289;21690289;21690289;21690289;21690289;21690289;21690289;21690289;21690289;21690289;21690289;21690289;23640045;24475013	Given all the data in this study, we could conclude that increased caveolin-1 in senescent human Mesenchymal stem cells might cause the attenuation of insulin signaling, PPARÎ³ induction, and thereby loss of adipogenic differentiation potential. ;CAV-1 encoded protein is a scaffold of membrane caveolae and coactivator of peroxisome proliferator-activated receptor gamma , which inhibits the oncoge…	Increased caveolin-1, a cause for the declined adipogenic potential of senescent human mesenchymal stem cells;IFITM1 promotes the metastasis of human colorectal cancer via CAV-1;Pharmacological activation of PPARÎ³ inhibits hypoxia-induced proliferation through a caveolin-1-targeted and -dependent mechanism in PASMCs;Pharmacological activation of PPARÎ³ inhibits hypoxia-induced proliferation thro…	PPARG
MYD88	positive Regulation: MYD88 --+> RELA	Regulation	positive	9	23141143;23141143;28459433;29061802;21383499;23015711;25522268;26510639;22931316;27158204	Thus, MyD88 and IRF3 synergistically activate NF-ÎºB p65 . ;Blockage of MyD88 adaptor molecule, inhibited IL-10 induced IRF3-dependent, IL-1Î² production as well as NFÎºB p65 phosphorylation suggesting that MyD88 adaptor molecule is a key molecule and when activated it may prolong the cardiomyocyte survival. ;MyD88 activates NF-ÎºB p65 (refs. 1,2), which then is rapidly degraded via ubiquitinatio…	Interleukin-10 activates Toll-like receptor 4 and requires MyD88 for cardiomyocyte survival;Interleukin-10 activates Toll-like receptor 4 and requires MyD88 for cardiomyocyte survival;S100-alarmin-induced innate immune programming protects newborn infants from sepsis;MYD88 inhibitor ST2825 suppresses the growth of lymphoma and leukaemia cells;A composite MyD88/CD40 switch synergistically activate…	RELA
MYD88	negative Regulation: MYD88 ---| POU5F1	Regulation	negative	1		MyD88 has been recently reported to downregulate OCT4, NANOG, and SOX2 during retinoic acid-induced differentiation [ ].	Role of OCT4 in cancer stem-like cells and chemotherapy resistance	POU5F1
SOD1	negative Regulation: SOD1 ---| RELA	Regulation	negative	1	16868554	Persistent upregulation of NF-ÎºB-family genes, NF-ÎºB p105, and RelA in the wild-type mice was blocked by overexpression of SOD1.	Reduced oxidative stress promotes NF-kappaB-mediated neuroprotective gene expression after transient focal cerebral ischemia: lymphocytotrophic cytokines and antiapoptotic factors.	RELA
